# Supplementary material for: Pd NP-loaded covalent organic framework for pH-switched Pickering emulsion catalytic dechlorination
Source: Royal Society of Chemistry journal article supplement (doi:10.1039/d3cc05982k), 2024-01-01
Supplement: d3cc05982k1.pdf [file d3cc05982k1.pdf]

Supporting Information for

# **Pd NP-loaded covalent organic framework for pH-switched Pickering emulsion catalytic dechlorination**

Han-Hui Wang<sup>‡</sup>, Fei Li<sup>‡</sup>, Bing-Jian Yao,<sup>\*</sup> and Yu-Bin Dong<sup>\*</sup>

College of Chemistry, Chemical Engineering and Materials Science, Collaborative Innovation Center of Functionalized Probes for Chemical Imaging in Universities of Shandong, Key Laboratory of Molecular and Nano Probes, Ministry of Education, Shandong Normal University, Jinan 250014, P. R. China.

Email: yaobingjian1986@163.com (B.-J. Yao), yubindong@sdu.edu.cn (Y.-B. Dong)

## **Content**

- 1. Instruments and materials (page S1)**
- 2. Synthesis and characterization of model compound (page S1)**
- 3. Synthesis and characterization of DhaTAPB-COOH (page S3)**
- 4. Synthesis and characterization of Pd@DhaTAPB-COOH (page S10)**
- 5. Preparation and characterization of the Pickering emulsion (page S10)**
- 6. Characterization of model decontamination reaction (page S12)**
- 7. Leaching test and reusable examination (page S14)**
- 8. Scope of decontamination reaction (page S16)**
- 9. References (page S17)**

## 1. Instruments and materials

All the reagents and chemicals were of analytical grade and were used as received without further purification.  $^1\text{H-NMR}$ , and  $^{13}\text{C-NMR}$  and solid-state  $^{13}\text{C}$  CP-MAS NMR spectra were recorded on Bruker Avance-400 HD and AVANCE II 400 spectrometers, respectively. Fourier transform infrared (FT-IR) spectra was conducted on a Bruker ALPHA spectrometer in the  $400\text{-}4000\text{ cm}^{-1}$  range. Transmission electron microscopy (TEM) was performed on with an accelerating voltage of 120 kV. Scanning electron microscopy (SEM) was conducted on a Gemini Zeiss SUPRA scanning electron microscope equipped with an energy-dispersive X-ray detector. The X-ray diffraction pattern was measured on a D8 Advance X-ray powder diffractometer with the  $\text{Cu } K_{\alpha}$  radiation ( $\lambda = 1.5405\text{ \AA}$ ). Elemental analysis was collected on a Flash EA 1112. X-ray photoelectron spectroscopy (XPS) data was obtained with a PHI 5000 Versaprobe-II electron spectrometer from Ulvac-Phi by analyzing the elements present in the air-facing side of the specimen films with a  $90^\circ$  to the electron beam determined using  $300\text{W Al } K_{\alpha}$  radiation. Inductively coupled plasma (ICP) measurement was performed on an IRIS Intrepid (II) XSP and Nu AttoM. Confocal fluorescence microscopy was performed on Leica Microsystems CMS GmbH (TCS SP5 II type) confocal microscopy. The water phase was stained with FITC prior to test. The emulsion was excited by a 488 nm laser. The hydrodynamic size and zeta potential of the samples were measured using a Malvern Zetasizer Nano ZS90 instrument. Water contact angle (WCA) on circular tablet was measured with sessile drop method by a commercial contact angle analyzer (Tracker, France), where a droplet ( $2\text{ }\mu\text{L}$ ) of DI water was deposited on the tablet in air using a precision syringe, the image was captured immediately after droplet deposited on the sample. Profile of the droplet was fitted to the Laplace-Young equation. Gas chromatography (GC) was performed using an Angilent 7890A device.

## 2. Synthesis and characterization of model compound

A mixture of salicylaldehyde (1.22 g, 10 mmol), aniline (0.93 g, 10 mmol), pyruvic acid ( $700\text{ }\mu\text{L}$ , 10 mmol), and HOAc (1 mL) in MeCN (20 mL) was reacted for 24 h at  $80\text{ }^\circ\text{C}$  under environmental condition. After removal of the solvent in vacuum, the crude product was purified via column chromatography (eluent: dichloromethane) to afford model compound as a yellow solid in 88 % yield.

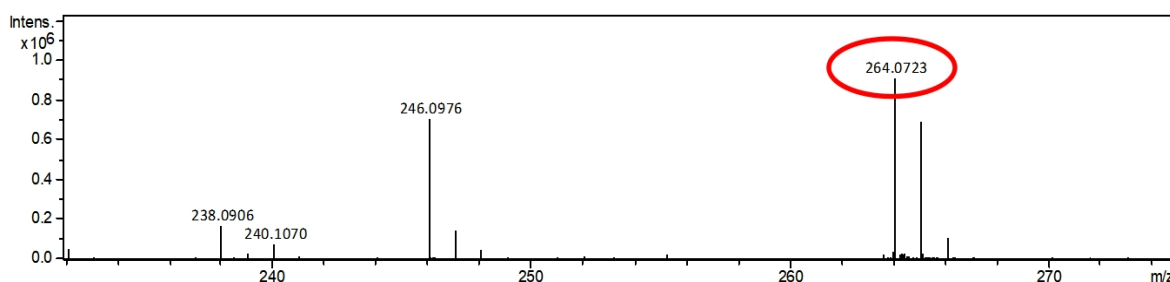

**Fig. S1** Mass spectrum of the model compound. ESI-MS  $m/z$  calcd for  $[\text{C}_{16}\text{H}_{10}\text{NO}_3]^-$  264.0700, found 264.0723.

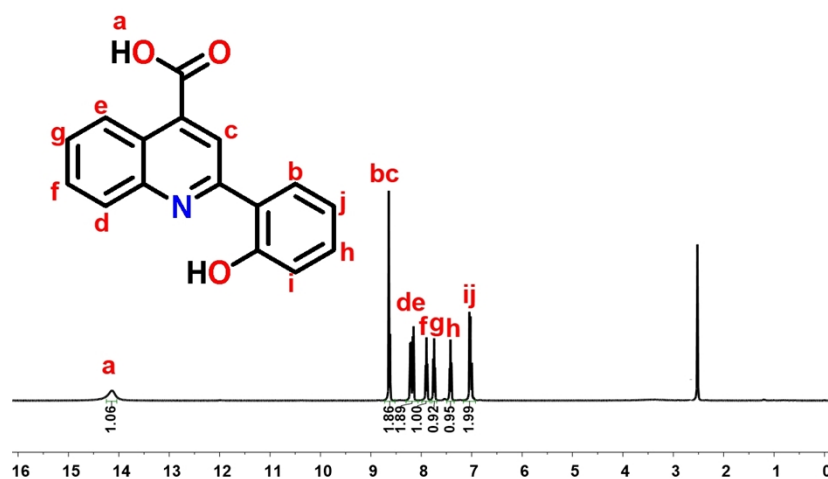

**Fig. S2**  $^1\text{H}$  NMR spectrum (400 MHz,  $\text{DMSO}-d_6$ ) of the model compound:  $\delta$  14.13 (s, 1H), 8.64 (d, 1H), 8.61 (s, 1H), 8.22 (d, 1H), 8.15 (d, 1H), 7.89 (t, 1H), 7.74 (t, 1H), 7.42 (t, 1H), 7.04(d, 1H), 7.01(m,1H).

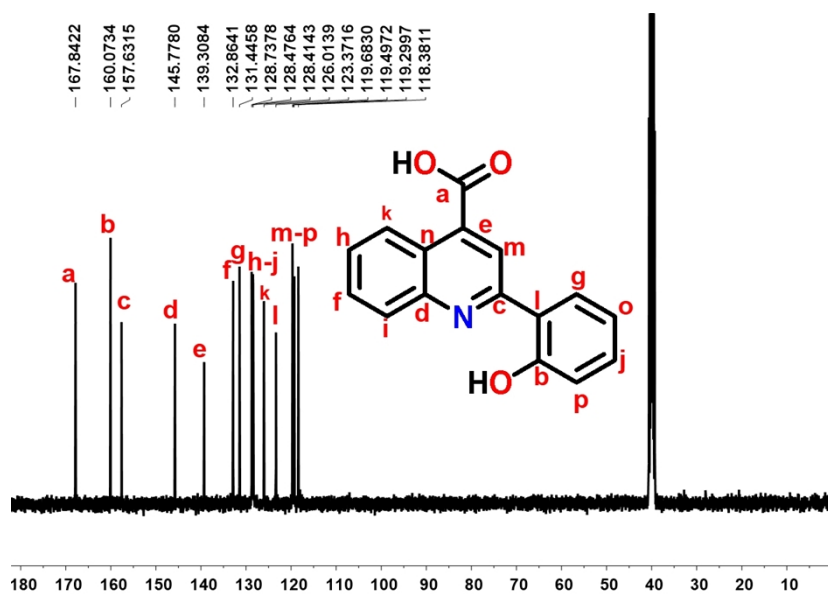

**Fig. S3**  $^{13}\text{C}$  NMR spectrum (100 MHz,  $\text{DMSO}-d_6$ ) of the model compound:  $\delta$  167.8, 160.0, 157.6, 145.7, 139.3, 132.8, 131.4, 128.7, 128.4, 128.4, 126.0, 123.3, 119.6, 119.4, 119.2, 118.3.

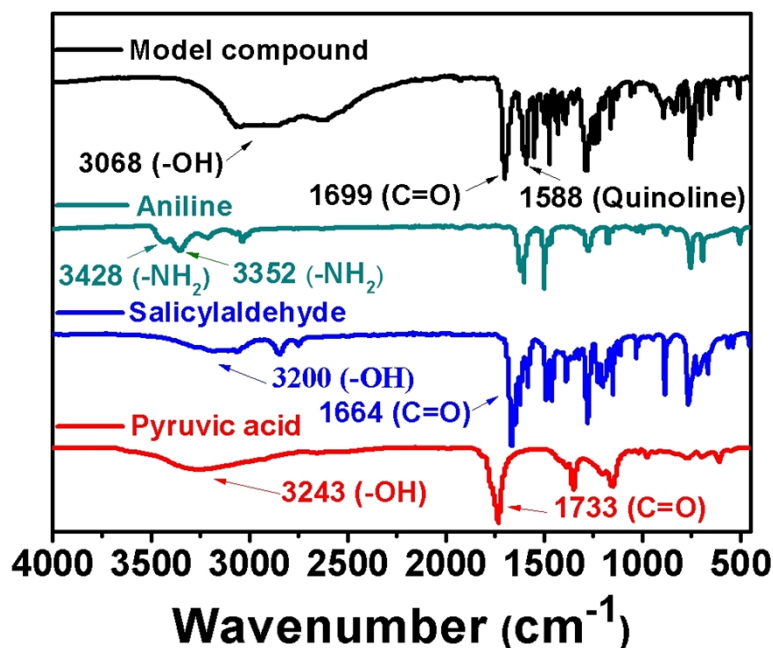

**Fig. S4** FTIR spectra (KBr,  $\text{cm}^{-1}$ ) of the model compound and its starting materials: The typical N-H peaks at 3428 and 3352  $\text{cm}^{-1}$  in aniline and the C=O peak at 1699  $\text{cm}^{-1}$  in salicylaldehyde completely disappeared after reaction. Meanwhile, the new characteristic peaks for C=N at 1588  $\text{cm}^{-1}$  demonstrated the formation of the quinolyl moiety in the model compound. The generation of continuous broad peaks around 2600~3068  $\text{cm}^{-1}$  indicated an associated state of the model compound due to the presence of hydrogen bond interaction. Additionally, the peak of 1699  $\text{cm}^{-1}$  belonging to the carboxylic acid group was also observed.

### 3. Synthesis and characterization of DhaTAPB-COOH

A mixture of Dha (10 mg, 0.06 mmol), TAPB (14 mg, 0.04 mmol), pyruvic acid (8.5  $\mu\text{L}$ , 0.12 mmol), and HOAc (12M, 0.5 mL) in MeCN (5 mL) was reacted for 7 days at 80  $^{\circ}\text{C}$  under environmental condition. The crude product was completely washing with acetone, THF and ethanol, and then dried under vacuum to afford **DhaTAPB-COOH** as a brick-red crystalline solid in 86 % yield (29.7 mg). FTIR (KBr,  $\text{cm}^{-1}$ ): 1496(-Ar), 1587 (Quinoline), 1719, (-C=O), 2994 (-OH) 3045 (-Ar-H), 3353 (-Ar-OH); Solid-state  $^{13}\text{C}$  CP-MAS NMR (400MHz, ppm): 170.7, 153.7, 140.2, 123.3; Anal. Calcd for  $(\text{C}_{90}\text{H}_{48}\text{N}_6\text{O}_{18})_n$ : C, 72.00; H, 3.22; N, 5.60; found: C, 72.21; H, 3.19; N, 5.58.

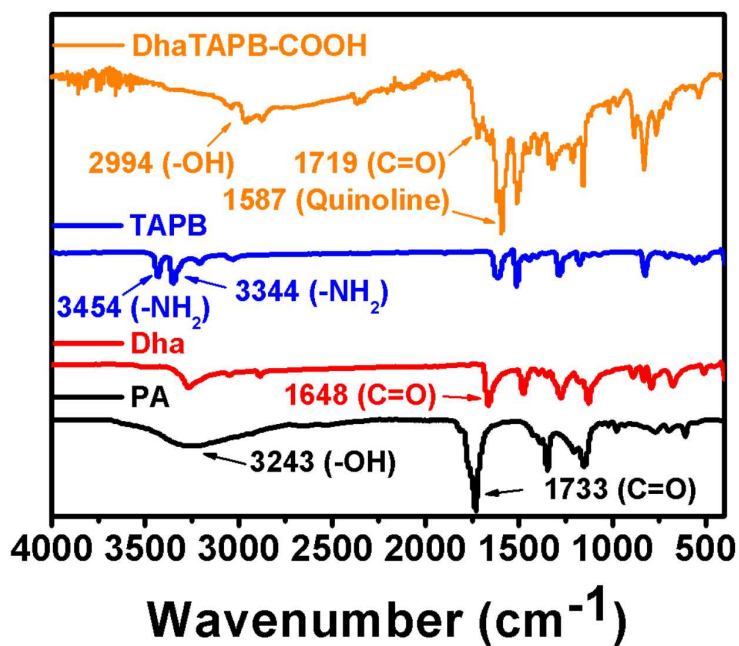

**Fig. S5** FTIR spectra of **DhaTAPB-COOH** and its monomers. The typical N–H peaks at 3454 and 3344  $\text{cm}^{-1}$  in TAPB and the C=O peak at 1648  $\text{cm}^{-1}$  in Dha completely disappeared after polymerization. Meanwhile, the new characteristic peaks for C=N at 1587  $\text{cm}^{-1}$  demonstrated the formation of the quinoly moiety in **DhaTAPB-COOH**. Additionally, the peak at 1719  $\text{cm}^{-1}$  for the carboxylic acid group was also observed.

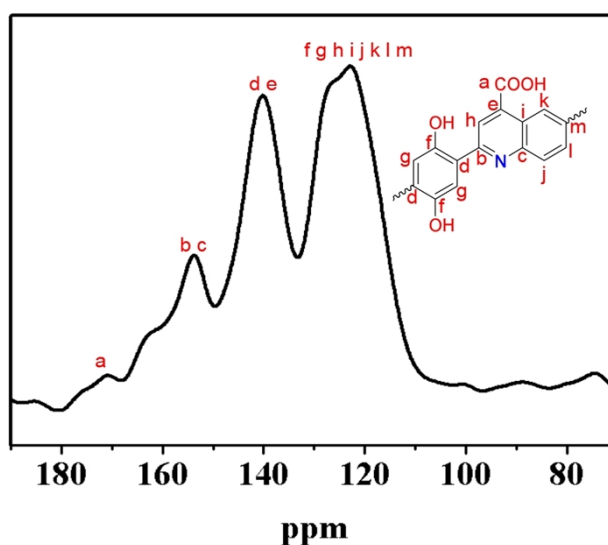

**Fig. S6**  $^{13}\text{C}$  CP-MAS solid-state NMR spectrum of **DhaTAPB-COOH**. A strong peak corresponding to quinolinecarboxylic acid carbon at 170.7 ppm, a strong peak corresponding to quinoly carbons at 153.7, 140.2, and 123 ppm were clearly observed, indicating the formation of quinoline carboxylic acid linkage. The above assignments were made based on the molecular model compounds and previous literature reports.<sup>1,2</sup>

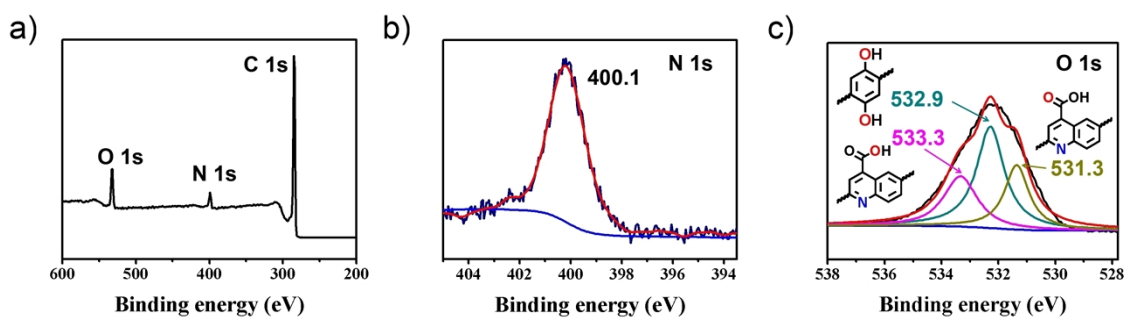

**Fig. S7** XPS spectrum of **DhaTAPB-COOH**. The expected elements of C, N, and O appeared in **DhaTAPB-COOH**. The N 1s peak at 400.1 eV and the three forms of O 1s peaks at 533.3 (-COOH), 532.9 (Ar-OH), and 531.3 eV (-COOH) confirmed the formation of quinoline-4-carboxylic acid groups.

**Table S1.** Fractional atomic coordinates for the unit Cell of **DhaTAPB-COOH**.

**DhaTAPB-COOH.** AA stacking mode, space group: *P6/m*

$a = 37.2538 \text{ \AA}$ ,  $b = 37.2538 \text{ \AA}$ ,  $c = 3.4794 \text{ \AA}$

$\alpha = 90.0^\circ$ ,  $\beta = 90.0^\circ$ ,  $\gamma = 120.0^\circ$ ,  $R_{wp} = 9.11 \%$  and  $R_p = 8.69 \%$

| Atom | x       | y       | z       |
|------|---------|---------|---------|
| C1   | 2.46811 | 0.63676 | 0.00023 |
| C2   | 2.42494 | 0.61104 | 0.00024 |
| C3   | 2.40671 | 0.56777 | 0.00024 |
| C4   | 2.43244 | 0.55032 | 0.00022 |
| C5   | 2.47571 | 0.57536 | 0.00021 |
| C6   | 2.49315 | 0.61853 | 0.00022 |
| C7   | 2.48698 | 0.6824  | 0.00023 |
| C8   | 2.50248 | 0.5565  | 0.0002  |
| C9   | 2.36107 | 0.54099 | 0.00025 |
| C10  | 2.5302  | 0.708   | 0.00022 |
| C11  | 2.54873 | 0.7513  | 0.00022 |
| C12  | 2.52295 | 0.76909 | 0.00023 |
| C13  | 2.4799  | 0.7438  | 0.00024 |
| C14  | 2.46203 | 0.70076 | 0.00024 |
| C15  | 2.33547 | 0.55861 | 0.00027 |
| C16  | 2.29217 | 0.53385 | 0.00028 |
| C17  | 2.27438 | 0.49027 | 0.00027 |
| C18  | 2.29967 | 0.47252 | 0.00025 |
| C19  | 2.34271 | 0.49769 | 0.00024 |
| C20  | 2.48486 | 0.51328 | 0.00019 |
| C21  | 2.50962 | 0.49474 | 0.00018 |
| C22  | 2.5532  | 0.52053 | 0.00018 |
| C23  | 2.57096 | 0.56357 | 0.00019 |
| C24  | 2.54578 | 0.58144 | 0.0002  |
| N25  | 2.53985 | 0.81089 | 0.00023 |
| N26  | 2.23259 | 0.46538 | 0.00027 |

|     |         |         |         |
|-----|---------|---------|---------|
| N27 | 2.57809 | 0.50362 | 0.00018 |
| C28 | 2.56273 | 0.46195 | 0.00017 |
| C29 | 2.59105 | 0.44459 | 0.00016 |
| C30 | 2.57404 | 0.40143 | 0.00016 |
| C31 | 2.59907 | 0.3834  | 0.00016 |
| C32 | 2.64264 | 0.40867 | 0.00017 |
| C33 | 2.65965 | 0.45183 | 0.00017 |
| C34 | 2.63462 | 0.46987 | 0.00017 |
| C35 | 2.67095 | 0.39131 | 0.00017 |
| N36 | 2.65559 | 0.34964 | 0.00017 |
| C37 | 2.68049 | 0.33273 | 0.00018 |
| C38 | 2.66273 | 0.28969 | 0.00018 |
| C39 | 2.68791 | 0.27182 | 0.00019 |
| C40 | 2.73121 | 0.29677 | 0.0002  |
| C41 | 2.74882 | 0.33998 | 0.0002  |
| C42 | 2.72407 | 0.35852 | 0.00019 |
| C43 | 2.75798 | 0.2779  | 0.00021 |
| C44 | 2.74054 | 0.23473 | 0.00021 |
| C45 | 2.76557 | 0.2165  | 0.00022 |
| C46 | 2.80874 | 0.24222 | 0.00023 |
| C47 | 2.82698 | 0.28549 | 0.00023 |
| C48 | 2.80125 | 0.30294 | 0.00022 |
| C49 | 2.87261 | 0.31227 | 0.00024 |
| C50 | 2.74671 | 0.17086 | 0.00023 |
| C51 | 2.70349 | 0.14526 | 0.00022 |
| C52 | 2.68495 | 0.10196 | 0.00022 |
| C53 | 2.71074 | 0.08417 | 0.00023 |
| C54 | 2.75379 | 0.10946 | 0.00023 |
| C55 | 2.77165 | 0.1525  | 0.00023 |
| C56 | 2.89822 | 0.29465 | 0.00026 |
| C57 | 2.94151 | 0.31941 | 0.00027 |
| C58 | 2.9593  | 0.36299 | 0.00026 |
| C59 | 2.93401 | 0.38074 | 0.00024 |
| C60 | 2.89097 | 0.35557 | 0.00023 |
| N61 | 3.0011  | 0.38788 | 0.00027 |
| N62 | 2.69384 | 0.04237 | 0.00023 |
| C63 | 2.58152 | 0.8372  | 0.00023 |
| C64 | 3.02741 | 0.37252 | 0.00029 |
| C65 | 2.65216 | 0.01606 | 0.00023 |
| O66 | 2.65341 | 0.51217 | 0.00018 |
| O67 | 2.58028 | 0.34109 | 0.00015 |
| C68 | 2.20627 | 0.48074 | 0.00029 |
| C69 | 2.1606  | 0.45242 | 0.0003  |

|      |         |         |         |
|------|---------|---------|---------|
| C70  | 2.59888 | 0.88288 | 0.00023 |
| C71  | 2.64204 | 0.90902 | 0.00022 |
| C72  | 2.66008 | 0.95209 | 0.00022 |
| C73  | 2.6348  | 0.97038 | 0.00023 |
| C74  | 2.59164 | 0.94424 | 0.00023 |
| C75  | 2.57361 | 0.90117 | 0.00023 |
| C76  | 2.13445 | 0.46944 | 0.0003  |
| C77  | 2.09138 | 0.44441 | 0.00029 |
| C78  | 2.07309 | 0.40084 | 0.00029 |
| C79  | 2.09924 | 0.38382 | 0.0003  |
| C80  | 2.1423  | 0.40885 | 0.0003  |
| O81  | 2.5313  | 0.87765 | 0.00023 |
| O82  | 2.16582 | 0.39007 | 0.0003  |
| O83  | 2.06786 | 0.46319 | 0.00029 |
| O84  | 2.70239 | 0.97561 | 0.00022 |
| C85  | 2.49255 | 0.45122 | 0.00017 |
| C86  | 2.51969 | 0.43547 | 0.00016 |
| C87  | 2.26573 | 0.55093 | 0.0003  |
| C88  | 2.22284 | 0.52379 | 0.00031 |
| C89  | 2.59225 | 0.77774 | 0.00022 |
| C90  | 2.60801 | 0.82064 | 0.00022 |
| C91  | 2.74114 | 0.40204 | 0.00019 |
| C92  | 2.714   | 0.4178  | 0.00018 |
| C93  | 2.64144 | 0.07552 | 0.00022 |
| C94  | 2.62568 | 0.03262 | 0.00022 |
| C95  | 2.96796 | 0.30233 | 0.00029 |
| C96  | 3.01085 | 0.32947 | 0.0003  |
| C97  | 0.95286 | 1.25709 | 1.00031 |
| O98  | 0.97869 | 1.24424 | 1.00032 |
| O99  | 0.91438 | 1.23062 | 1.00031 |
| C100 | 1.28083 | 1.59617 | 1.00031 |
| O101 | 1.25499 | 1.60902 | 1.00033 |
| O102 | 1.31931 | 1.62264 | 1.00031 |
| C103 | 1.4473  | 1.42108 | 1.00016 |
| O104 | 1.43446 | 1.38239 | 1.00015 |
| O105 | 1.42084 | 1.43309 | 1.00016 |
| C106 | 1.78638 | 1.43218 | 1.0002  |
| O107 | 1.79923 | 1.47087 | 1.0002  |
| O108 | 1.81285 | 1.42017 | 1.0002  |
| C109 | 1.61129 | 1.09062 | 1.00022 |
| O110 | 1.57261 | 1.06478 | 1.00022 |
| O111 | 1.62331 | 1.1291  | 1.00022 |
| C112 | 1.6224  | 0.76264 | 1.00021 |



|      |         |         |         |
|------|---------|---------|---------|
| O113 | 1.66108 | 0.78848 | 1.0002  |
| O114 | 1.61038 | 0.72416 | 1.0002  |
| H115 | 2.40402 | 0.62523 | 0.00025 |
| H116 | 2.41824 | 0.5152  | 0.00022 |
| H117 | 2.52827 | 0.63946 | 0.00021 |
| H118 | 2.55101 | 0.69368 | 0.00022 |
| H119 | 2.45924 | 0.7583  | 0.00025 |
| H120 | 2.42687 | 0.68019 | 0.00025 |
| H121 | 2.34979 | 0.59375 | 0.00028 |
| H122 | 2.28517 | 0.43736 | 0.00024 |
| H123 | 2.36328 | 0.48309 | 0.00022 |
| H124 | 2.44973 | 0.49246 | 0.00019 |
| H125 | 2.60611 | 0.58423 | 0.0002  |
| H126 | 2.56038 | 0.61661 | 0.00021 |
| H127 | 2.53896 | 0.38018 | 0.00015 |
| H128 | 2.69473 | 0.47308 | 0.00018 |
| H129 | 2.62758 | 0.26903 | 0.00018 |
| H130 | 2.67331 | 0.23666 | 0.00019 |
| H131 | 2.78396 | 0.3608  | 0.00021 |
| H132 | 2.70542 | 0.2138  | 0.00021 |
| H133 | 2.82967 | 0.22803 | 0.00024 |
| H134 | 2.81544 | 0.33806 | 0.00022 |
| H135 | 2.68268 | 0.15958 | 0.00022 |
| H136 | 2.77444 | 0.09496 | 0.00023 |
| H137 | 2.80682 | 0.17307 | 0.00023 |
| H138 | 2.88389 | 0.25952 | 0.00027 |
| H139 | 2.94851 | 0.4159  | 0.00024 |
| H140 | 2.8704  | 0.37017 | 0.00022 |
| H141 | 2.68338 | 0.53155 | 0.12203 |
| H142 | 2.54861 | 0.32773 | 0.122   |
| H143 | 2.66329 | 0.8952  | 0.00022 |
| H144 | 2.5704  | 0.95807 | 0.00023 |
| H145 | 2.14828 | 0.50451 | 0.00029 |
| H146 | 2.08541 | 0.34875 | 0.0003  |
| H147 | 2.51838 | 0.89039 | 0.21269 |
| H148 | 2.14233 | 0.34789 | 0.14622 |
| H149 | 2.0851  | 0.4937  | 0.14621 |
| H150 | 2.71725 | 0.96231 | 0.21267 |
| H151 | 2.50686 | 0.40054 | 0.00015 |
| H152 | 2.20074 | 0.53662 | 0.00032 |
| H153 | 2.64294 | 0.84274 | 0.00021 |
| H154 | 2.72683 | 0.45272 | 0.00018 |
| H155 | 2.59075 | 0.01052 | 0.00022 |

|      |         |         |         |
|------|---------|---------|---------|
| H156 | 3.03295 | 0.31665 | 0.00032 |
| H157 | 0.89967 | 1.18087 | 1.21053 |
| H158 | 1.3256  | 1.64752 | 1.21053 |
| H159 | 1.38066 | 1.40383 | 1.16794 |
| H160 | 1.84049 | 1.44231 | 1.16799 |
| H161 | 1.59726 | 1.13373 | 1.088   |
| H162 | 1.64027 | 0.70671 | 1.08799 |

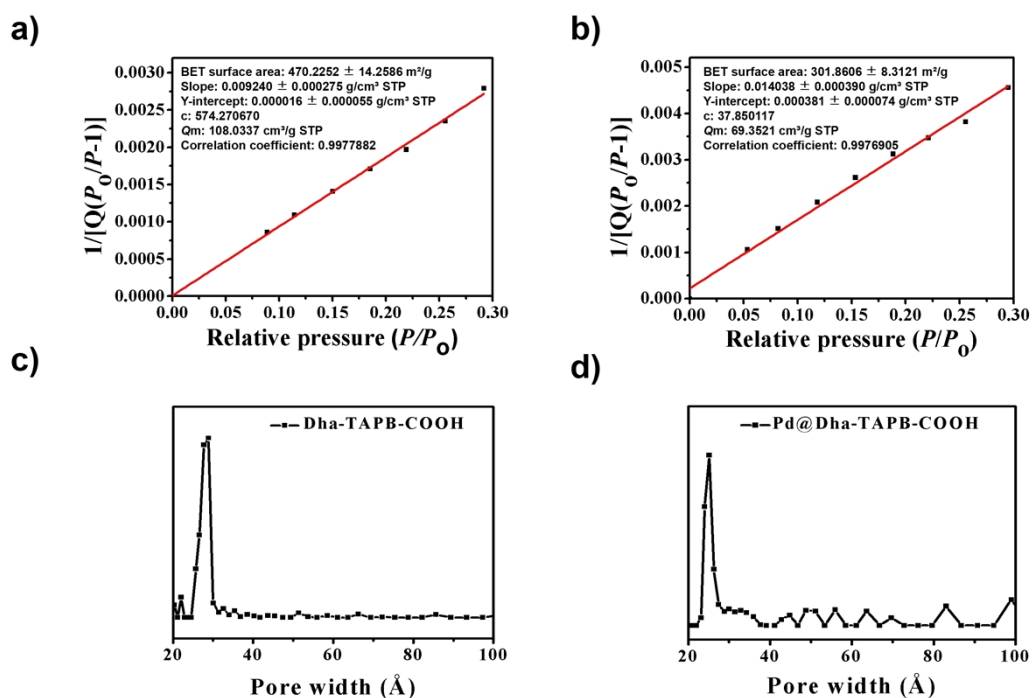

**Fig. S8** BET fitting of a) DhaTAPB-COOH and b) Pd@DhaTAPB-COOH carried out using the  $\text{N}_2$  isotherm at 77 k. c) Pore size distribution of DhaTAPB-COOH ( $28.5 \text{ \AA}$ ) and Pd@DhaTAPB-COOH ( $23 \text{ \AA}$ ), respectively.

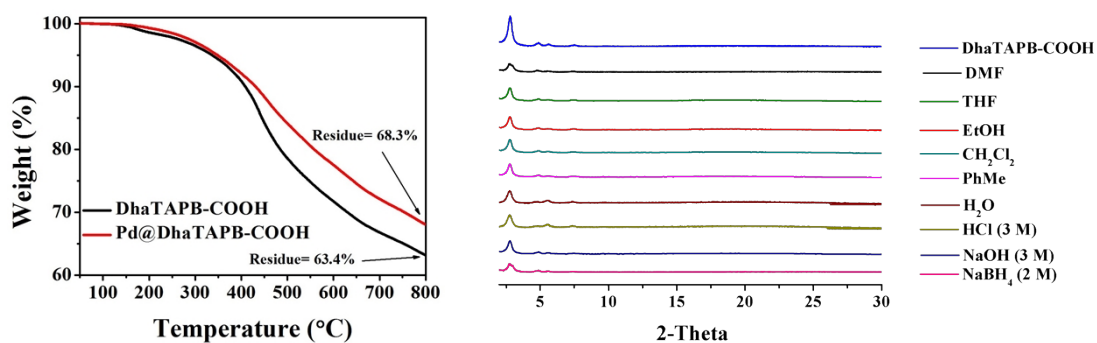

**Fig. S9** Left: TGA curves of DhaTAPB-COOH and Pd(II)@DhaTAPB-COOH; Right: PXRD patterns of DhaTAPB-COOH before and after soaking in different media for 24 h.

#### 4. Synthesis and characterization of Pd@DhaTAPB-COOH

**DhaTAPB-COOH** (100 mg) was added to a MeOH solution (50 mL) of Pd(OAc)<sub>2</sub> (30 mg), and the mixture was stirred at 45 °C for 12 h. The resulting solid was isolated and washed with DCM and dried under vacuum at 60 °C for 6 h. The obtained **Pd(II)@DhaTAPB-COOH** was mixed with NaBH<sub>4</sub> (30 mg) in H<sub>2</sub>O (50 mL), and the mixture was stirred at room temperature for 10 h to afford **Pd@DhaTAPB-COOH** as dark brown crystalline solids. The obtained crystalline solids were washed with water, acetone and dried under vacuum at 80 °C for 12 h. As determined by inductively coupled plasma (ICP), the loading amount of Pd NPs was up to 14.1 wt%.

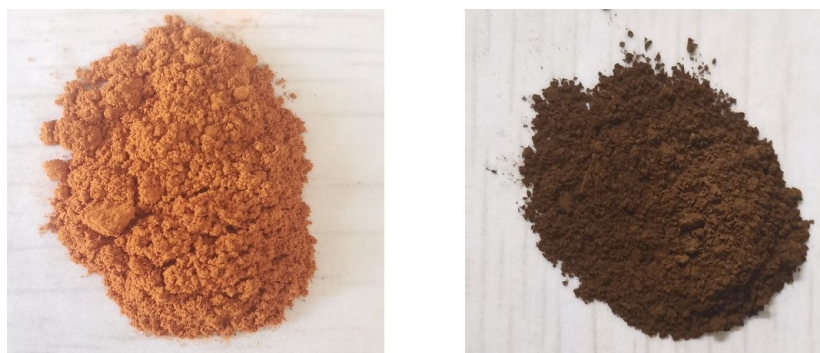

**Fig. S10** Photos of **DhaTAPB-COOH** (left) and **Pd@DhaTAPB-COOH** (right).

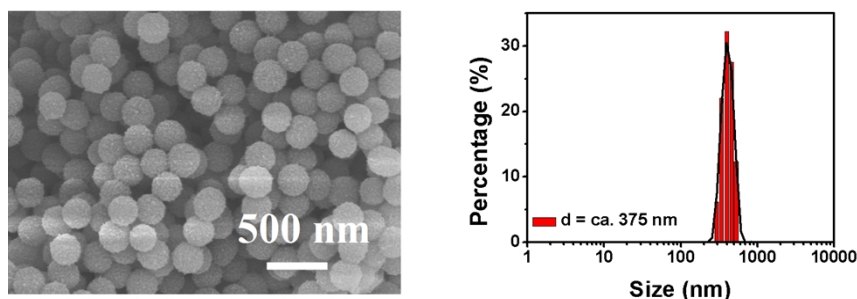

**Fig. S11** Left: SEM image. Right: DLS size profile of **Pd@DhaTAPB-COOH**.

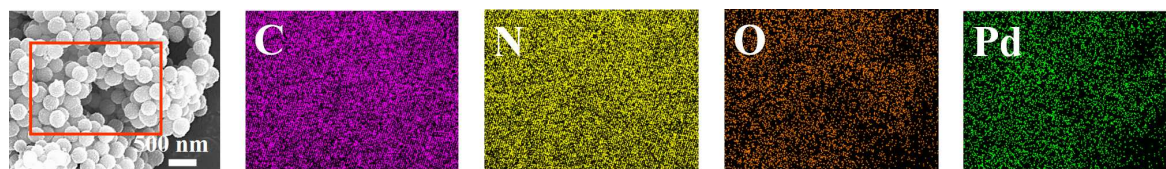

**Fig. S12** SEM-EDX elemental mapping images of **Pd@DhaTAPB-COOH**.

#### 5. Preparation and characterization of the Pickering emulsion

To prepare the **Pd@DhaTAPB-COOH**-based Pickering emulsion (abbreviated as **Pd@DhaTAPB-COOH-PE**), toluene and deionized water are used as the incompatible oil and water phase, respectively. Typically, **Pd@DhaTAPB-COOH** (55 mg) were added into

a glass vial containing water-toluene (1.2 mL/1.8 mL, 2 : 3 in v/v) mixture. The system was homogenized at 6000 rpm for 60s to generate 2.0 wt% **Pd@DhaTAPB-COOH-PE**. Emulsions with different **Pd@DhaTAPB-COOH** contents and water/oil ratios were fabricated in the similar procedure. Stability of the emulsions was assessed by visual inspection and confocal images before and after long standing. To test the pH-triggered demulsification behaviour of the as-synthesized Pickering emulsions, the pH value was adjusted with 1.5 M HCl and NaOH aqueous solution, respectively. The effect of water-to-toluene ratio, and the content of emulsifiers on the phase separation behavior was investigated by both visual inspection and confocal microscopy.

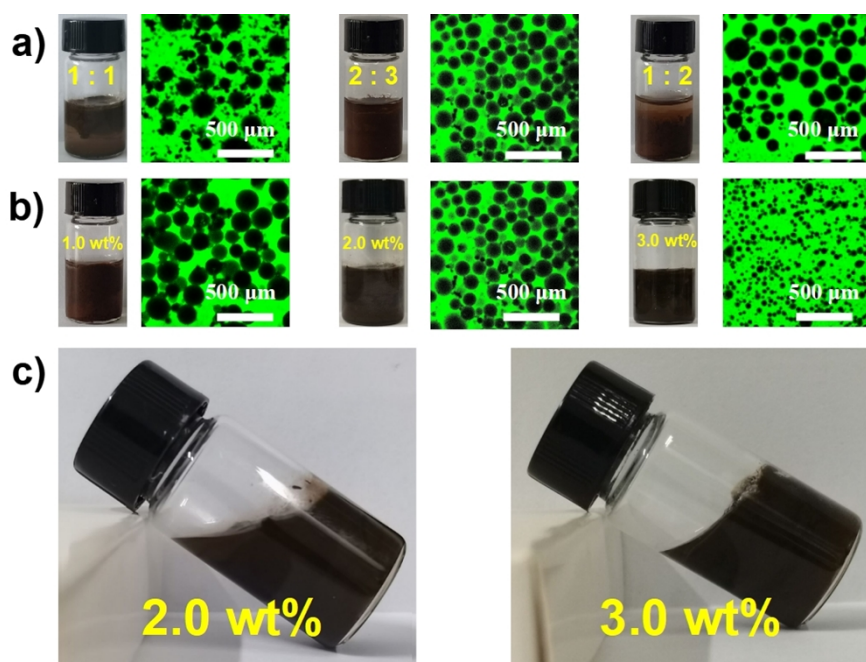

**Fig. S13** Visual and confocal microscopy images of **Pd@DhaTAPB-COOH-PE** with different water-to-toluene ratios. b) Corresponding images with different contents of **Pd@DhaTAPB-COOH** (1.0 wt% to 3.0 wt%) in a fixed water-to-toluene ratio of 2 : 3, v/v. For the confocal microscopy images, the aqueous phase was stained with FITC prior to the test, and the emulsion was excited by laser at 488 nm. c) Comparison of the Pickering emulsions stabilized by 2.0 wt% and 3.0 wt% of **Pd@DhaTAPB-COOH**, the latter has a higher viscosity.

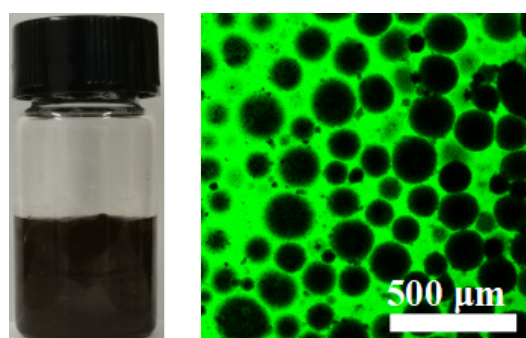

**Fig. S14** Visual and confocal microscopy images of **Pd@DhaTAPB-COOH-PE** (2.0 wt%, water-to-toluene ratio of 2 : 3, v/v) after storage naturally for two weeks.

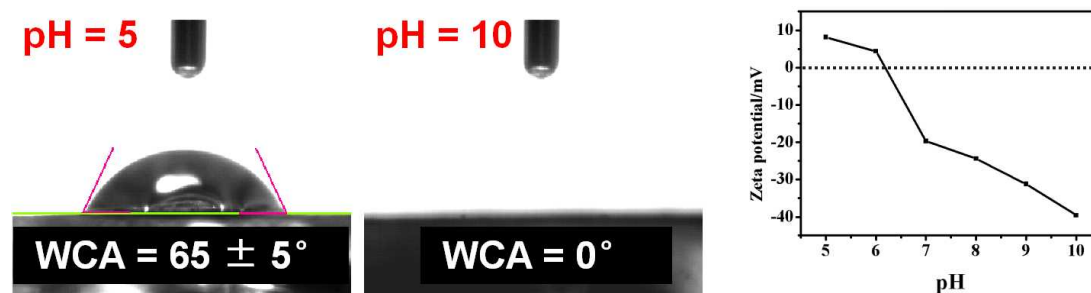

**Fig. S15** Water contact angles (WCAs) and zeta potential values of **Pd@DhaTAPB-COOH** measured at different pH values. The WCA value of **Pd@DhaTAPB-COOH** decreased from 65 to 0° when the pH was adjusted from 5.0 to 10.0. Meanwhile, the  $\zeta$  value gradually decreased from 9 to -40 within the pH range of 5-10, indicating a negatively charged property of **Pd@DhaTAPB-COOH** under alkaline conditions.

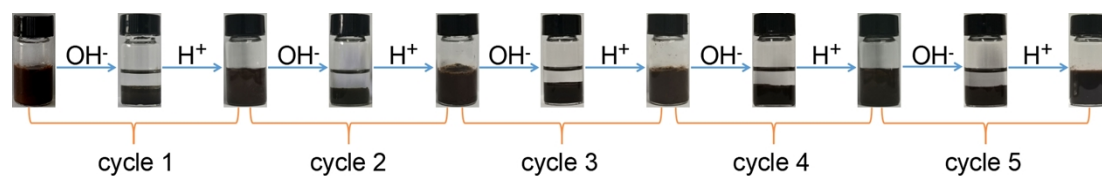

**Fig. S16** Visual images of the pH-driven emulsification-demulsification cycles.

## 6. Characterization of model decontamination reaction

**Reaction condition.** The biphasic catalytic CBs decontamination reaction was carried over **Pd@DhaTAPB-COOH-PE**. Typically, a mixture of 4-chlorophenol (7.6 mmol) and  $\text{HCO}_2\text{NH}_4$  (76 mmol) was stirred in the prepared Pickering emulsion with toluene (1.8 mL)-water (1.2 mL) containing 55 mg of **Pd@DhaTAPB-COOH** (2 wt%, 8 mg of Pd NPs, 1.0 mol% equiv). The reaction processed at room temperature in air and it was monitored by GC.

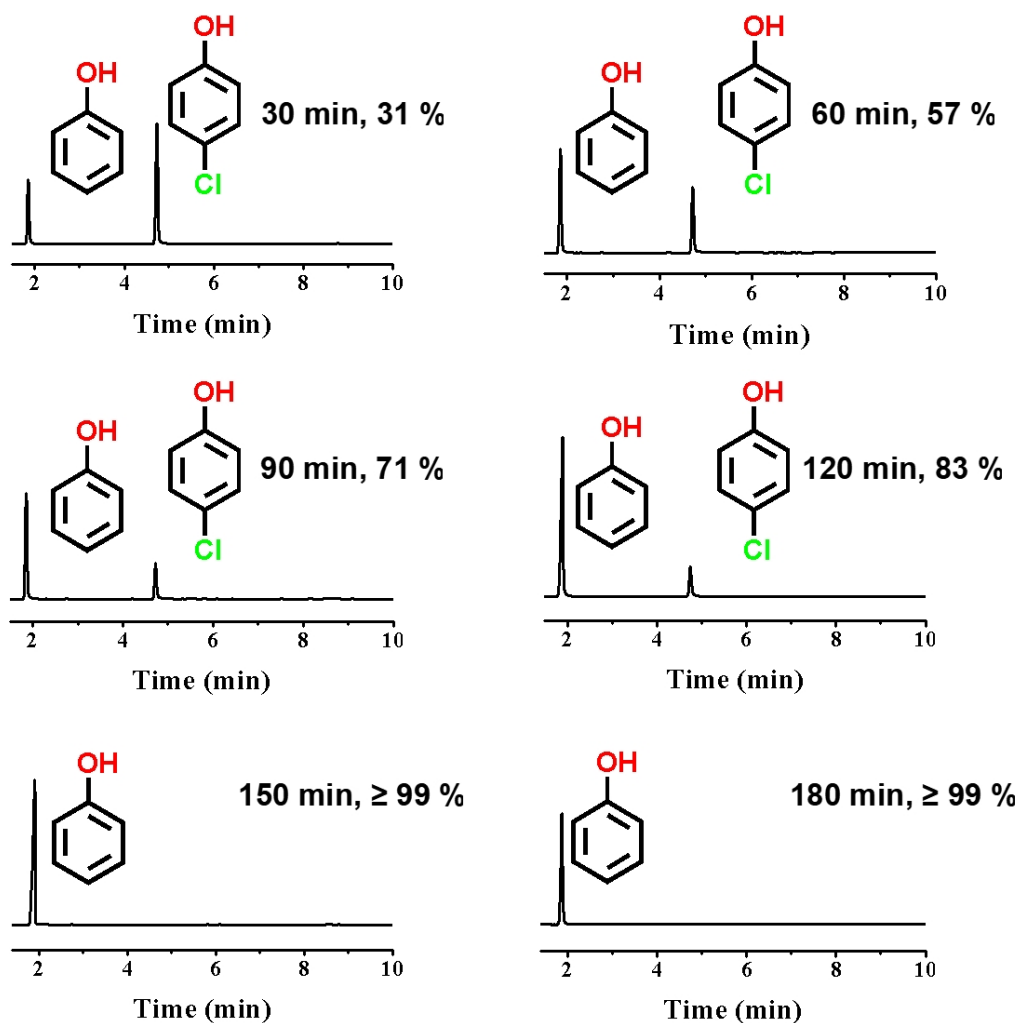

Fig. S17 GC results of the model decontamination reaction at different time intervals.

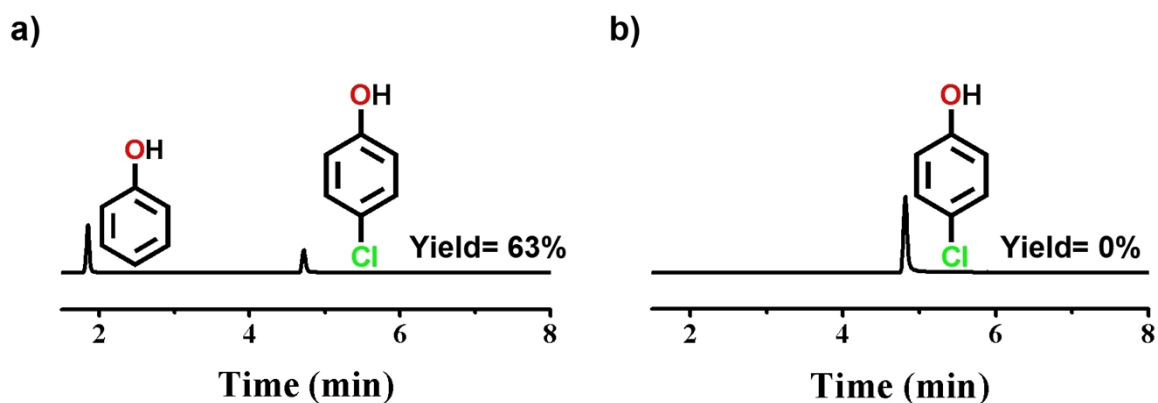

Fig. S18 GC results of a) the model decontamination reaction of the oil-water two-phase mixture system over Pd@DhaTAPB-COOH and b) Pickering emulsion stabilized by 2.0 wt % DhaTAPB-COOH (DhaTAPB-COOH-PE) under given condition, respectively.

## 7. Leaching test and reusable examination

**Catalyst recovery.** Once the reaction finished, pH value of the reaction system was adjusted to 10.0 by 1.5 M NaOH aqueous solution with mild stirring. After the complete phase separation, the target organic product in the upper toluene phase was isolated, while the bottom aqueous phase containing **Pd@DhaTAPB-COOH** in the sodium form was collected and reused for the next catalytic run after regeneration via adjusting pH value to ca. 6.0 using aqueous HCl (1.5 M) solution.

**Leaching test.** The solid **Pd@DhaTAPB-COOH** was separated from the catalytic Pickering emulsion right after reaction for the given time (1.0 h) by centrifugation. The reaction was continued with the filtrate without the aid of **Pd@DhaTAPB-COOH** combining the emulsifier and catalyst. No further increase in the yield of the target product was detected, demonstrating that the active site for the catalytic dechlorination was located on **Pd@DhaTAPB-COOH**.

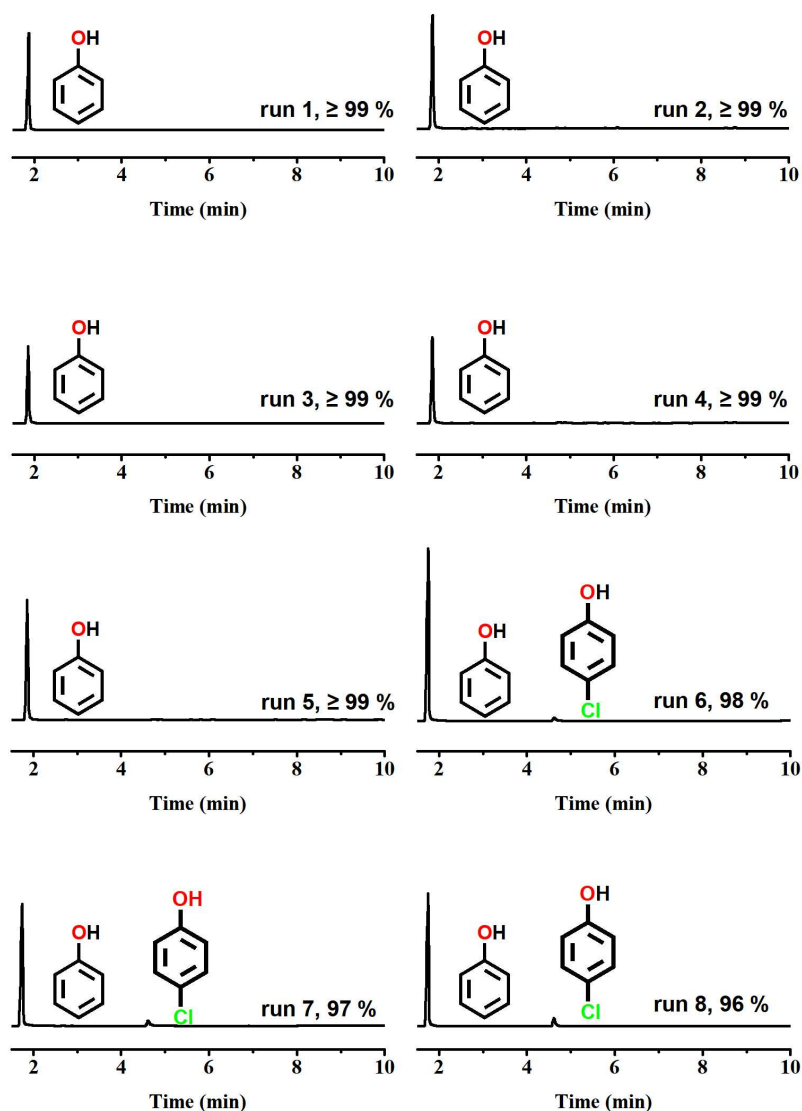

Fig. S19 GC results of the model decontamination reaction for each catalytic run.



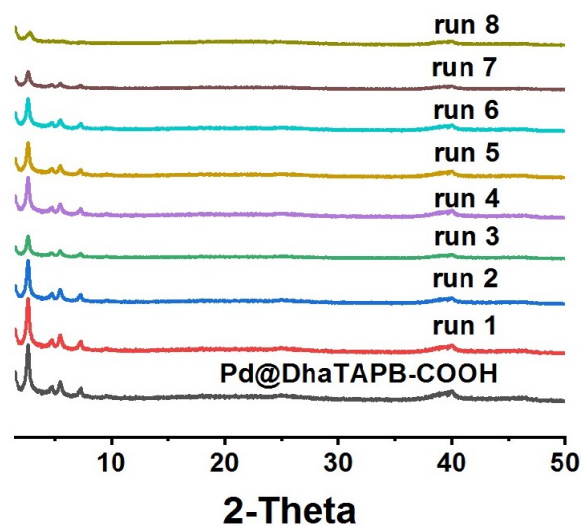

Fig. S20 PXRD patterns of Pd@DhaTAPB-COOH before and after each catalytic run.

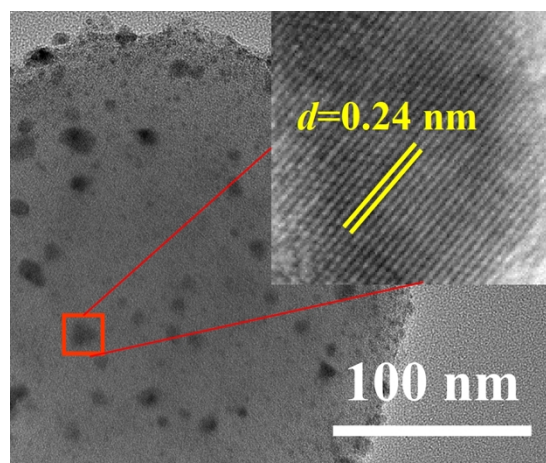

Fig. S21 HRTEM image of Pd@DhaTAPB-COOH after eight catalytic runs.

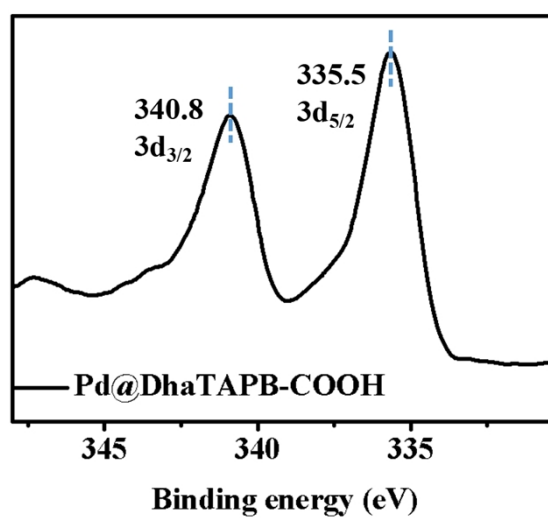

Fig. S22 XPS spectrum of Pd species in Pd@DhaTAPB-COOH after eight catalytic runs.



## 8. Scope of decontamination reaction

**General procedure.** The biphasic catalytic CBs decontamination reaction was carried over **Pd@DhaTAPB-COOH-PE**. Typically, a mixture of ArCl (7.6 mmol) and  $\text{HCO}_2\text{NH}_4$  (76 mmol) was stirred in the prepared Pickering emulsion with toluene (1.8 mL)-water (1.2 mL) containing 55 mg of **Pd@DhaTAPB-COOH** (2 wt %, 8 mg of Pd NPs, 1.0 mol% equiv). The reaction processed at room temperature in air and it was monitored by GC.

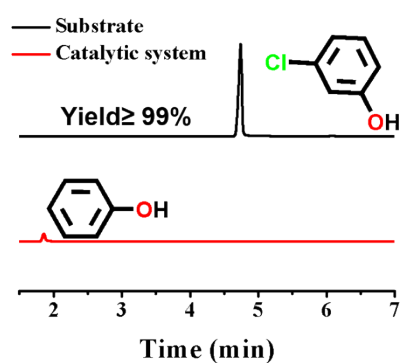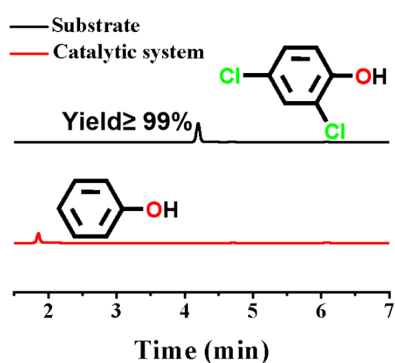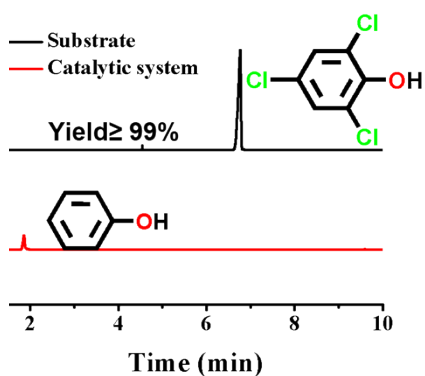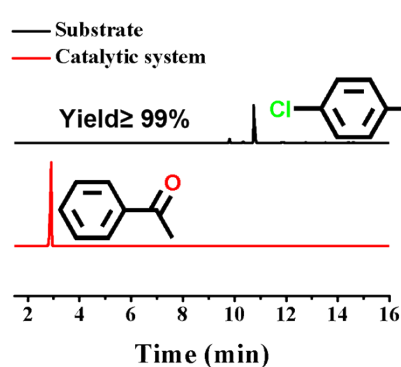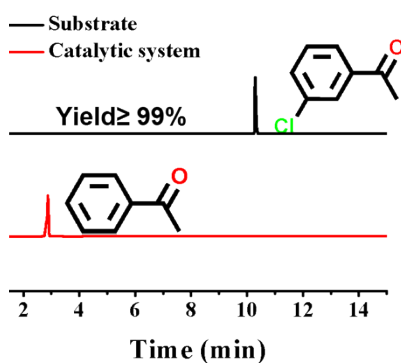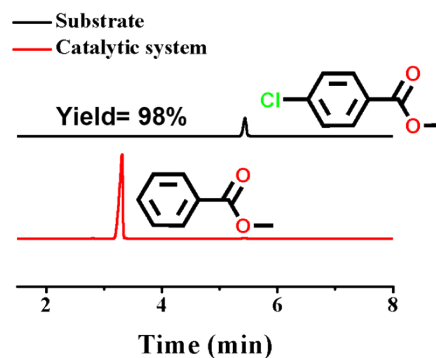

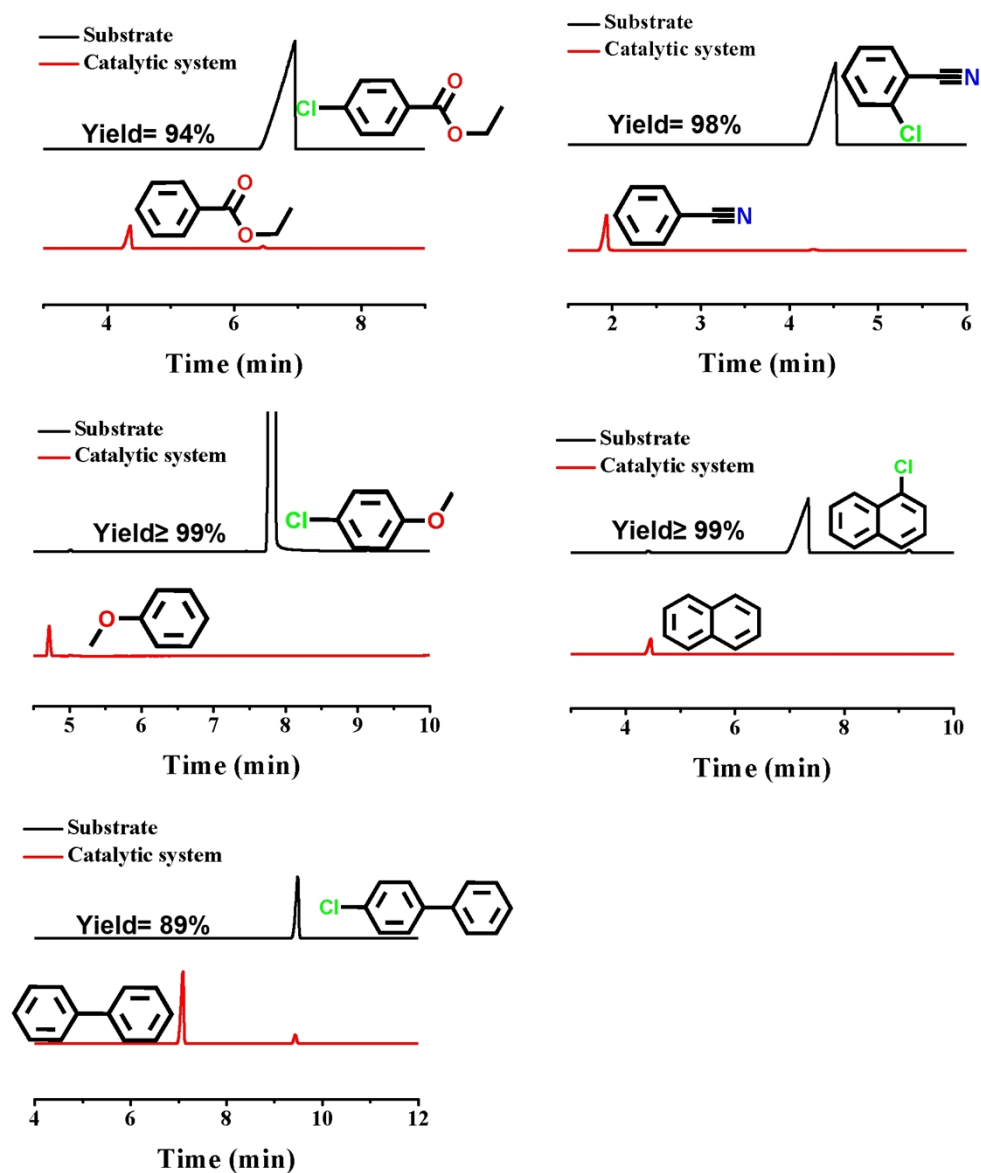

Fig. S23 GC results of the decontamination products generated from different substrates (for Table 1).

## 9. References

- [1] Y.-L. Yang, L. Yu, T.-C. Chu, H.-Y. Niu, J. Wang and Y.-Q. Cai, *Nat. Commun.*, 2022, **13**, 2615.
- [2] L.-G. Ding, S. Wang, B.-J. Yao, W.-X. Wu, J.-L. Kan, Y.-Y. Liu, J.-Q. Wu and Y.-B. Dong, *J. Mater. Chem. A*, 2022, **10**, 3346–3358
